# Supplementary material
Source: Springer Nature journal article supplement (https://www.springermedizin.de/resource/supplementary/12877_2011_598_MOESM2_ESM.pdf/9439946)

"control" unit

Patient follow-up

"intervention" unit

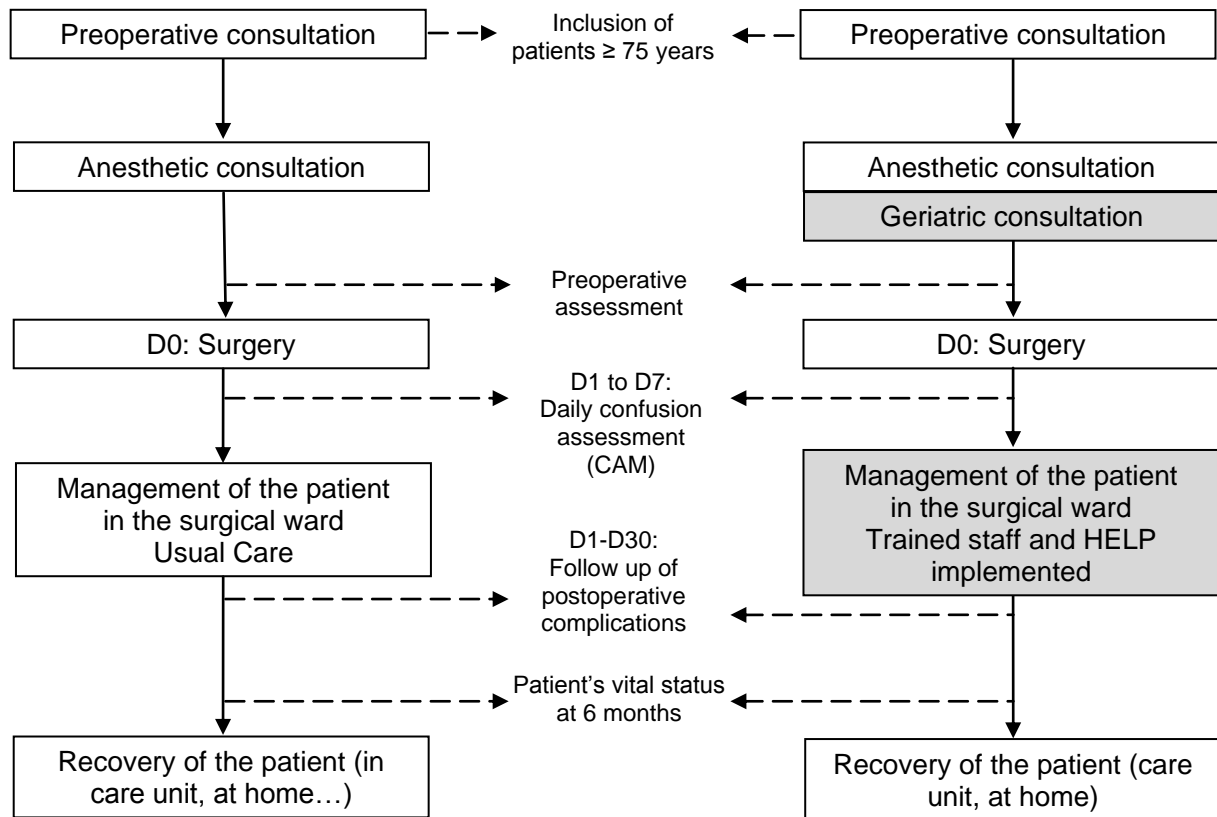

Supplement: MOESM2 [file 9439946]
